# Supplementary material for: Differences between Two Groups of Burmese Vipers (Viperidae: Azemiops) in the Proteomic Profiles, Immunoreactivity and Biochemical Functions of Their Venoms
Source: MDPI journal article supplement (doi:10.3390/toxins14080572), 2022-08-22
Supplement: s1 [file s1]

**Table S1.** Assignment of the RP-HPLC fractions from Sichuan *Azemiops feae* venom to protein families by MALDI-TOF-MS/MS and nESI-MS/MS of selected peptide ions from in-gel digested protein bands separated by SDS-PAGE. CNP: C-type natriuretic peptide; CRISP, cysteine-rich secretory protein; HA: Hyaluronidase; LAAO: L-amino acid oxidase; NGF: nerve growth factor; PLA<sub>2</sub>, phospholipase A<sub>2</sub>; PLB: phospholipase B; SVMP: snake venom metalloproteinase; SVSP: snake venom serine proteinase; Unknown: unidentified components.

| Peak | %    | MW<br>(kDa) | Peptide Ion |   | Score | MS/MS-derived sequence  | Protein family/species/accession   |
|------|------|-------------|-------------|---|-------|-------------------------|------------------------------------|
|      |      |             | m/z         | z |       |                         |                                    |
| 1    | 2.16 | -           | 581.0       | 3 | 84    | AAATPQKLAKGRGAAATSA     | CNP; <i>Azemiops feae</i> ; K4IT20 |
|      |      |             | 610.0       | 3 | 71    | SDSKAAATPQKLAKGRGAA     |                                    |
|      |      |             | 633.7       | 3 | 68    | SDSKAAATPQKLAKGRGAAA    |                                    |
|      |      |             | 608.8       | 2 | 66    | SDSKAAATPQKL            |                                    |
|      |      |             | 556.9       | 2 | 50    | RLKGLAKKGAA             |                                    |
|      |      |             | 627.8       | 2 | 47    | SLRPEAASGPAAAAG         |                                    |
|      |      |             | 599.4       | 2 | 45    | PRPPRPRPKP              |                                    |
|      |      |             | 682.4       | 2 | 44    | KPPHQGPRPPRP            |                                    |
|      |      |             | 458.8       | 2 | 43    | KPPHQGPR                |                                    |
|      |      |             | 857.5       | 2 | 42    | PPHQGPRPPRPRPKP         |                                    |
|      |      |             | 357.9       | 3 | 42    | RGVGGGGSRL              |                                    |
|      |      |             | 521.3       | 2 | 37    | HQGPRPPRP               |                                    |
|      |      |             | 367.6       | 3 | 36    | RPPRPRPKP               |                                    |
|      |      |             | 409.2       | 2 | 35    | GAAATSARL               |                                    |
|      |      |             | 1041.7      | 1 | 34    | RLKGLAKKGA              |                                    |
|      |      |             | 614.7       | 3 | 33    | KPPHQGPRPPRPRPKP        |                                    |
|      |      |             | 760.4       | 2 | 32    | HQGPRPPRPRPKP           |                                    |
| 2    | 1.12 | -           | 720.1       | 3 | 93    | SDSKAAATPQKLAKGRGAAATSA | CNP; <i>A. feae</i> ; K4IT20       |
|      |      |             | 371.6       | 3 | 52    | RLKGLAKKGAA             |                                    |
|      |      |             | 682.4       | 2 | 49    | KPPHQGPRPPRP            |                                    |
|      |      |             | 410.6       | 3 | 46    | AKGRGAAATSARL           |                                    |
| 3    | 1.21 | -           | 633.7       | 3 | 46    | SDSKAAATPQKLAKGRGAAA    | CNP; <i>A. feae</i> ; K4IT20       |
|      |      |             | 430.7       | 2 | 64    | LPPHPHY                 |                                    |
| 4    | 0.10 | -           | 645.4       | 2 | 65    | KGRGAAATSARLM           | CNP; <i>A. feae</i> ; K4IT20       |
|      |      |             | 552.8       | 2 | 59    | RGAAATSARLM             |                                    |
|      |      |             | 680.9       | 2 | 48    | AKGRGAAATSARLM          |                                    |
|      |      |             | 637.8       | 2 | 47    | DLRTDGKQWR              |                                    |

| Peak | %     | MW<br>(kDa) | Peptide Ion |   | Score | MS/MS-derived sequence | Protein family/species/accession               |
|------|-------|-------------|-------------|---|-------|------------------------|------------------------------------------------|
|      |       |             | m/z         | z |       |                        |                                                |
| 5    | 2.07  | -           | 637.8       | 2 | 54    | DLRTDGKQWR             | CNP; <i>A. feae</i> ; K4IT20                   |
|      |       |             | 509.3       | 2 | 39    | KPPGVYYPP              |                                                |
|      |       |             | 750.4       | 2 | 38    | QKWGRMVPPKGES          |                                                |
|      |       |             | 454.3       | 3 | 34    | AKGRGAAATSARLM         |                                                |
| 6    | 2.40  | -           | 491.9       | 3 | 54    | LAKGRGAAATSARLM        | CNP; <i>A. feae</i> ; K4IT20                   |
|      |       |             | 557.3       | 2 | 51    | GPAAAGVGDGWR           |                                                |
|      |       |             | 750.4       | 2 | 49    | QKWGRMVPPKGES          |                                                |
|      |       |             | 509.3       | 2 | 41    | KPPGVYYPP              |                                                |
|      |       |             | 600.8       | 2 | 40    | SGPAAAGVGDGWR          |                                                |
|      |       |             | 636.3       | 2 | 40    | ASGPAAAGVGDGWR         |                                                |
|      |       |             | 671.8       | 2 | 39    | AASGPAAAGVGDGWR        |                                                |
|      |       |             | 460.7       | 2 | 25    | KPGVYYPP               |                                                |
| 7    | 7.41  | -           | 575.6       | 3 | 63    | RPEAASGPAAAGVGDGWR     | CNP; <i>A. feae</i> ; K4IT20                   |
|      |       |             | 613.3       | 3 | 63    | LRPEAASGPAAAGVGDGWR    |                                                |
|      |       |             | 736.4       | 2 | 50    | EAASGPAAAGVGDGWR       |                                                |
|      |       |             | 552.0       | 3 | 47    | REELSLRPEAASGPAA       |                                                |
|      |       |             | 748.9       | 2 | 41    | ELSLRPEAASGPAAAG       |                                                |
|      |       |             | 588.3       | 2 | 40    | KPVQYLPPHP             |                                                |
|      |       |             | 600.8       | 2 | 39    | SGPAAAGVGDGWR          |                                                |
|      |       |             | 684.9       | 2 | 38    | ELSLRPEAASGPAA         |                                                |
|      |       |             | 400.6       | 3 | 37    | REELSLRPEA             |                                                |
|      |       |             | 509.3       | 2 | 36    | KPPGVYYPP              |                                                |
|      |       |             | 813.4       | 2 | 35    | EELSLRPEAASGPAAAG      |                                                |
|      |       |             | 473.9       | 3 | 35    | DEKPVQYLPPHP           |                                                |
|      |       |             | 594.6       | 3 | 35    | REELSLRPEAASGPAAAG     |                                                |
|      |       |             | 460.7       | 2 | 34    | KPPGVYYPP              |                                                |
| 8    | 36.52 | 4.7         | 388.7       | 2 | 67    | VTGCDPK                | PLA <sub>2</sub> ; <i>A. feae</i> ; A0A0D3N8V5 |
| 9    | 0.12  | 10.0        | 403.7       | 2 | 15    | AAAICFR                | PLA <sub>2</sub> ; <i>A. feae</i> ; A7X4P4     |
|      | 0.27  | 4.0         | 1138.5      | 1 | 15    | SVDFDSESPR             | CRISP; <i>Crotalus horridus</i> ; ~F2Q6E7      |
| 10   | 0.18  | 25.4        | 1905.0      | 1 | 78    | KPEIQNEIVDLHNSLR       | SVMP; <i>Trimeresurus stejnegeri</i> ; ~Q2LD49 |
|      |       |             | 634.3       | 2 | 67    | LYCIDSSPANK            |                                                |
|      |       |             | 423.9       | 3 | 53    | SAECTDRFQR             |                                                |
|      |       |             | 634.3       | 2 | 70    | LYCIDSSPANK            |                                                |
|      | 0.04  | 13.9        |             |   |       |                        | SVMP; <i>T. stejnegeri</i> ; ~Q2LD49           |

| Peak | %    | MW<br>(kDa) | Peptide Ion |   | Score | MS/MS-derived sequence | Protein family/species/accession                                       |
|------|------|-------------|-------------|---|-------|------------------------|------------------------------------------------------------------------|
|      |      |             | m/z         | z |       |                        |                                                                        |
| 11   | 0.04 | 10.5        | 1535.5      | 1 | 35    | CCFEHDCCYGK            | PLA <sub>2</sub> ; <i>Bothriechis nigroviridis</i> ; ~C0HJL8           |
|      | 0.20 | 4.6         | 517.8       | 2 | 43    | GCFGLPLDR              | CNP; <i>A. feae</i> ; K4IT20                                           |
|      | 0.20 |             | 404.7       | 2 | 34    | AAAICFR                | PLA <sub>2</sub> ; <i>Protobothrops flavoviridis</i> ; ~S6B451         |
|      | 0.44 | 23.3        | 647.3       | 2 | 42    | IDTACVCVISR            | NGF; <i>A. feae</i> ; Q2XXL6                                           |
|      |      |             | 549.3       | 2 | 38    | NPNPVPSGCR             |                                                                        |
|      | 0.10 | 16.6        | 1097.5      | 1 | 42    | NPNPVPSGCR             | NGF; <i>A. feae</i> ; Q2XXL6                                           |
|      |      |             | 1293.6      | 1 | 80    | IDTACVCVISR            |                                                                        |
|      |      |             | 1413.6      | 1 | 11    | CRNPNPVPSGCR           |                                                                        |
|      |      |             | 1825.8      | 1 | 57    | HWNSYCTTTHTYVR         |                                                                        |
|      | 0.52 | 14.4        | 403.7       | 2 | 29    | AAAICFR                | PLA <sub>2</sub> ; <i>A. feae</i> ; A7X4P4                             |
|      |      |             | 440.2       | 2 | 19    | AVCECDK                |                                                                        |
|      |      |             | 436.7       | 2 | 17    | NNVIVCR                |                                                                        |
| 12   | 0.04 | 9.3         | -           | - | -     | -                      | Unknown                                                                |
|      | 0.46 | 16.4        | 947.4       | 1 | 49    | EGNQASWR               | NGF; <i>A. feae</i> ; Q2XXL6                                           |
|      |      |             | 1097.5      | 1 | 80    | NPNPVPSGCR             |                                                                        |
|      |      |             | 1293.6      | 1 | 78    | IDTACVCVISR            |                                                                        |
|      |      |             | 1413.6      | 1 | 28    | CRNPNPVPSGCR           |                                                                        |
| 13   |      |             | 1825.8      | 1 | 77    | HWNSYCTTTHTYVR         |                                                                        |
|      | 0.04 | 27.5        | 1369.6      | 1 | 60    | CQFKTAGELCR            | PLA <sub>2</sub> ; <i>Protobothrops mucrosquamatus</i> ; ~XP_015683146 |
|      |      |             | 1737.8      | 1 | 78    | DGHPCQNNLGycFR         |                                                                        |
|      | 0.56 | 16.6        | 947.4       | 1 | 54    | EGNQASWR               | NGF; <i>A. feae</i> ; Q2XXL6                                           |
|      |      |             | 1097.5      | 1 | 79    | NPNPVPSGCR             |                                                                        |
| 14   |      |             | 1293.6      | 1 | 81    | IDTACVCVISR            |                                                                        |
|      |      |             | 1413.6      | 1 | 32    | CRNPNPVPSGCR           |                                                                        |
|      |      |             | 1825.8      | 1 | 25    | HWNSYCTTTHTYVR         |                                                                        |
|      | 0.03 | 50.8        | 1148.6      | 1 | 29    | MIPCAAKDVK             | SVMP; <i>Hoplocephalus bungaroides</i> ; ~R4FIL3                       |
|      | 0.11 | 40.5        | 1259.6      | 1 | 76    | YSVGIVQDHNK            | SVMP; <i>Echis coloratus</i> ; ~A0A0A1WCK4                             |
|      | 0.01 | 29.6        | 1905.1      | 1 | 42    | KPEIQNEIVDLHNSLR       | CRISP; <i>A. feae</i> ; F2Q6E3                                         |
|      | 0.01 | 26.3        | 1138.5      | 1 | 34    | SVDfDSESPR             | CRISP; <i>Deinagkistrodon acutus</i> ; ~F2Q6G1                         |
|      |      |             | 1553.7      | 1 | 10    | MEWYPEAAANAER          |                                                                        |
|      |      |             | 1905.0      | 1 | 22    | KPEIQNEIVDLHNSLR       |                                                                        |
|      | 0.04 | 19.3        | 947.4       | 1 | 28    | EGNQASWR               | NGF; <i>A. feae</i> ; Q2XXL6                                           |
|      |      |             | 1097.5      | 1 | 20    | NPNPVPSGCR             |                                                                        |

| Peak | %    | MW<br>(kDa) | Peptide Ion |   | Score | MS/MS-derived sequence       | Protein family/species/accession                      |
|------|------|-------------|-------------|---|-------|------------------------------|-------------------------------------------------------|
|      |      |             | m/z         | z |       |                              |                                                       |
| 15   | 0.01 | 16.6        | 1293.6      | 1 | 66    | IDTACVVCVISR                 | PLA <sub>2</sub> ; <i>A. feae</i> ; A7X4P4            |
|      |      |             | 403.7       | 2 | 53    | AAAICFR                      |                                                       |
|      | 0.04 | 48.0        | 1537.7      | 1 | 14    | MEWYPEAAANAER                | CRISP; <i>A. feae</i> ; F2Q6E3                        |
|      |      |             | 1905.0      | 1 | 32    | KPEIQNEIVDLHNSLR             |                                                       |
|      | 5.24 | 26.1        | 1537.7      | 1 | 33    | MEWYPEAAANAER                | CRISP; <i>A. feae</i> ; F2Q6E3                        |
|      |      |             | 1553.7      | 1 | 17    | MEWYPEAAANAER                |                                                       |
|      | 0.36 | 20.2        | 1905.1      | 1 | 95    | KPEIQNEIVDLHNSLR             | CRISP; <i>C. horridus</i> ; ~F2Q6E5                   |
|      |      |             | 1138.5      | 1 | 50    | SVDFDSESPR                   |                                                       |
|      |      |             | 1553.6      | 1 | 31    | MEWYPEAAANAER                |                                                       |
|      |      |             | 1905.0      | 1 | 134   | KPEIQNEIVDLHNSLR             |                                                       |
| 16   | 0.15 | 26.6        | 1535.5      | 1 | 40    | CCFEHDCCYGK                  | PLA <sub>2</sub> ; <i>B. nigroviridis</i> ; ~C0HJL8   |
|      | 0.49 | 31.3        | 1304.6      | 1 | 57    | NFQMQLGVHSK                  | SVSP; <i>A. feae</i> ; A0A1Y0DIB6                     |
|      |      |             | 1429.7      | 1 | 32    | VLNDDEQTRDPK                 |                                                       |
|      | 0.32 | 25.3        | 2929.5      | 1 | 138   | LNSPVHESTHIAPLSLSPSSPTVGSVCR | SVSP; <i>A. feae</i> ; A0A1Y0DIC1                     |
| 17   | 0.01 | 19.2        | 2929.5      | 1 | 108   | LNSPVHESTHIAPLSLSPSSPTVGSVCR | SVSP; <i>A. feae</i> ; A0A1Y0DIC1                     |
|      | 0.32 | 16.6        | 1535.5      | 1 | 44    | CCFEHDCCYGK                  | PLA <sub>2</sub> ; <i>B. nigroviridis</i> ; ~C0HJL8   |
|      | 0.08 | 56.1        | 494.5       | 3 | 82    | VVGGDCECNINDHR               | SVSP; <i>Trimeresurus purpureomaculatus</i> ; ~P0DJF7 |
|      |      |             | 741.8       | 2 | 85    | VVGGDCECNINDHR               |                                                       |
|      | 0.59 | 31.6        | 1288.6      | 1 | 42    | NFQMQLGVHSK                  | SVSP; <i>A. feae</i> ; A0A1Y0DIB6                     |
|      |      |             | 1304.6      | 1 | 56    | NFQMQLGVHSK                  |                                                       |
|      | 0.74 | 25.8        | 1304.6      | 1 | 35    | NFQMQLGVHSK                  | SVSP; <i>A. feae</i> ; A0A1Y0DIB6                     |
|      | 0.94 | 16.8        | 1535.5      | 1 | 55    | CCFEHDCCYGK                  | PLA <sub>2</sub> ; <i>B. nigroviridis</i> ; ~C0HJL8   |
|      | 0.88 | 55.3        | 1594.7      | 1 | 80    | TLCAGILQGGTDTCK              | SVSP; <i>A. feae</i> ; A0A1Y0DIB5                     |
|      |      |             | 1003.6      | 1 | 46    | ALYPGLLEK                    |                                                       |
| 18   | 1.11 | 44.3        | 1095.7      | 1 | 57    | FLVALYTLR                    | SVSP; <i>A. feae</i> ; A0A1Y0DIB4                     |
|      |      |             | 2233.2      | 1 | 63    | NSAHIAPLSLPSSPPSVGSVCR       |                                                       |
|      |      |             | 2480.2      | 1 | 20    | ETYPDVPHCANINIVDHAVCR        |                                                       |
|      |      |             | 2929.5      | 1 | 148   | LNSPVHESTHIAPLSLSPSSPTVGSVCR |                                                       |
|      | 0.88 | 31.4        | 2929.5      | 1 | 174   | LNSPVHESTHIAPLSLSPSSPTVGSVCR | SVSP; <i>A. feae</i> ; A0A1Y0DIC1                     |
|      | 0.83 | 26.2        | 2929.5      | 1 | 174   | LNSPVHESTHIAPLSLSPSSPTVGSVCR | SVSP; <i>A. feae</i> ; A0A1Y0DIC1                     |
|      | 2.32 | 16.9        | 1535.5      | 1 | 45    | CCFEHDCCYGK                  | PLA <sub>2</sub> ; <i>B. nigroviridis</i> ; ~C0HJL8   |
|      |      |             | 2093.8      | 1 | 36    | DATDRCCFEHDCCYGK             |                                                       |
|      | 7.74 | 19.2        | 1505.6      | 1 | 6     | CCFVHDCCYGK                  | PLA <sub>2</sub> ; <i>A. feae</i> ; A0A0D3N8V5        |
|      |      |             | 1728.8      | 1 | 49    | EVCECDKAAAICFR               |                                                       |

| Peak | %    | MW<br>(kDa) | Peptide Ion |      | Score | MS/MS-derived sequence | Protein family/species/accession                |
|------|------|-------------|-------------|------|-------|------------------------|-------------------------------------------------|
|      |      |             | m/z         | z    |       |                        |                                                 |
| 20   | 0.15 | 27.0        | 918.5       | 1    | 35    | VYPGLLEK               | SVSP; <i>A. feae</i> ; A0A1Y0DIC1               |
|      |      |             | 5.97        | 21.2 | 34    | TDPYPYSR               | PLA <sub>2</sub> ; <i>A. feae</i> ; A0A0D3N944  |
|      |      |             | 1534.5      | 1    | 43    | CCFEHNCCYGK            |                                                 |
|      |      |             | 2330.0      | 1    | 117   | IAFDTYTFYGCNCGWEGLR    |                                                 |
| 21   | 0.54 | 27.9        | 1003.6      | 1    | 49    | ALYPGLLEK              | SVSP; <i>A. feae</i> ; A0A1Y0DIB4               |
|      |      |             | 1095.7      | 1    | 54    | FLVALYTLR              |                                                 |
|      |      |             | 2233.1      | 1    | 145   | NSAHIAPLSLPSSPPSVGSVCR |                                                 |
|      |      |             | 2480.1      | 1    | 98    | ETYPDVPHCANINIVDHAVCR  |                                                 |
|      | 0.66 | 21.9        | 1095.7      | 1    | 36    | FLVALYTLR              | SVSP; <i>A. feae</i> ; A0A1Y0DIB4               |
|      |      |             | 2233.2      | 1    | 70    | NSAHIAPLSLPSSPPSVGSVCR |                                                 |
|      | 0.16 | 17.8        | 1003.6      | 1    | 42    | ALYPGLLEK              | SVSP; <i>A. feae</i> ; A0A1Y0DIB4               |
|      |      |             | 2233.2      | 1    | 104   | NSAHIAPLSLPSSPPSVGSVCR |                                                 |
| 22   | 0.32 | 31.8        | 2480.2      | 1    | 103   | ETYPDVPHCANINIVDHAVCR  |                                                 |
|      |      |             | 1138.5      | 1    | 38    | SVDFDSESPR             | CRISP; <i>C. horridus</i> ; ~F2Q6E5             |
|      |      |             | 1553.7      | 1    | 4     | MEWYPEAAANAER          |                                                 |
|      |      |             | 1905.1      | 1    | 50    | KPEIQNEIVDLHNSLR       |                                                 |
|      | 1.66 | 16.8        | 1022.5      | 1    | 58    | TLHYIYGR               | PLA <sub>2</sub> ; <i>A. feae</i> ; A7X4P4      |
|      |      |             | 1488.7      | 1    | 95    | IGLQFYVDAFCR           |                                                 |
|      |      |             | 1533.6      | 1    | 73    | CCFVHDCCYGR            |                                                 |
|      |      |             | 1967.9      | 1    | 171   | NPVTSYSAYGCYCGVGGR     |                                                 |
| 23   | 0.77 | 69.2        | 1127.6      | 1    | 48    | AHGWIDSTIK             | LAAO; <i>Demansia vestigiata</i> ; ~A6MFL0      |
|      |      |             | 2.31        | 57.6 | 17    | ITFEPPLPPK             | LAAO; <i>Bothrops pictus</i> ; ~X2L4E2          |
|      |      |             | 1294.8      | 1    | 35    | RITFEPPLPPK            |                                                 |
|      |      |             | 1388.7      | 1    | 42    | KFWEDDGIHGGK           |                                                 |
|      | 0.27 | 40.3        | 1138.6      | 1    | 10    | ITFEPPLPPK             | LAAO; <i>Lachesis muta</i> ; ~J7H670            |
|      |      |             | 1266.8      | 1    | 22    | ITFEPPLPPK             |                                                 |
|      | 0.81 | 37.0        | 1137.5      | 1    | 30    | HDDIFAYEK              | LAAO; <i>B. pictus</i> ; ~X2L4E2                |
|      |      |             | 1266.7      | 1    | 17    | ITFEPPLPPK             |                                                 |
| 24   | 1.13 | 63.7        | 1294.7      | 1    | 18    | RITFEPPLPPK            |                                                 |
|      |      |             | 1852.0      | 1    | 140   | DSTALFPNIYLETVLR       | HA; <i>Agkistrodon piscivorus</i> ; ~A0A194ART0 |
|      |      |             | 1889.9      | 1    | 103   | HSDSNAFLHLFPDSFR       |                                                 |
| 25   | 1.01 | 65.4        | 2018.0      | 1    | 92    | KHSDSNAFLHLFPDSFR      |                                                 |
|      |      |             | 1615.5      | 1    | 32    | ECEIGECCDQCR           | SVMP; <i>E. coloratus</i> ; ~E9JG68             |

| Peak | %    | MW<br>(kDa) | Peptide Ion |   | Score | MS/MS-derived sequence                | Protein family/species/accession                                    |
|------|------|-------------|-------------|---|-------|---------------------------------------|---------------------------------------------------------------------|
|      |      |             | m/z         | z |       |                                       |                                                                     |
| 26   | 0.23 | 48.4        | 1069.4      | 3 | 4     | KYPCHYDYSEDPDYGM <u>V</u> VDHGTICADGK | SVMP; <i>Bothrops atrox</i> ; ~A0A1L8D666                           |
|      | 0.18 | 98.5        | 567.3       | 2 | 38    | YPVKPSEEGK                            | LAAO; <i>L. muta</i> ; ~J7H670                                      |
|      |      |             | 422.7       | 2 | 36    | VAEELKR                               |                                                                     |
|      | 0.43 | 41.6        | 438.7       | 2 | 41    | STTDLPSR                              | LAAO; <i>Gloydus blomhoffii</i> ; ~Q90W54                           |
|      |      |             | 567.3       | 2 | 33    | YPVKPSEEGK                            |                                                                     |
|      | 0.09 | 35.5        | 438.7       | 2 | 34    | STTDLPSR                              | LAAO; <i>Oxyuranus scutellatus scutellatus</i> ; ~Q4JHE3            |
|      | 0.80 | 61.1        | 594.2       | 2 | 51    | DSCCDAATCK                            | SVMP; <i>Gloydus halysi</i> ; ~Q8AWI5                               |
|      |      |             | 634.3       | 2 | 43    | LYCIDSSPANK                           |                                                                     |
|      |      |             | 529.8       | 2 | 35    | IACEPQNVK                             |                                                                     |
|      |      |             | 402.7       | 2 | 32    | SAADVTLK                              |                                                                     |
|      | 0.47 | 45.6        | 535.2       | 2 | 45    | IAN <u>MM</u> ADSGK                   | PLB; <i>Crotalus adamanteus</i> ; ~F8S101                           |
|      |      |             | 527.2       | 2 | 43    | IAN <u>MM</u> ADSGK                   |                                                                     |
|      |      |             | 700.8       | 2 | 38    | DQGKVTDM <u>ESMK</u>                  |                                                                     |
|      | 0.23 | 37.3        | 535.2       | 2 | 60    | IAN <u>MM</u> ADSGK                   | PLB; <i>C. adamanteus</i> ; ~F8S101                                 |
|      | 0.25 | 32.2        | 756.3       | 2 | 63    | SGPTCGDCPSACDK                        | CRISP; <i>A. feae</i> ; F2Q6E3                                      |
|      |      |             | 569.8       | 2 | 43    | SVDFDSESPR                            |                                                                     |
|      |      |             | 507.7       | 2 | 42    | CNEDHSPR                              |                                                                     |
|      | 0.44 | 24.7        | 555.8       | 2 | 52    | DNLDTYQNK                             | PLA <sub>2</sub> ; <i>Protobothrops mangshanensis</i> ; ~A0A0H3U271 |
|      | 0.20 | 20.3        | 437.7       | 2 | 42    | NNVIVCR                               | PLA <sub>2</sub> ; <i>A. feae</i> ; A7X4P4                          |
| 27   |      |             | 472.7       | 2 | 35    | CPEGQKEP                              |                                                                     |
|      | 0.26 | 44.0        | 1259.6      | 1 | 59    | YSVGIVQDHNK                           | SVMP; <i>E. coloratus</i> ; ~E9JGA2                                 |
|      | 0.32 | 40.2        | 1259.6      | 1 | 64    | YSVGIVQDHNK                           | SVMP; <i>E. coloratus</i> ; ~A0A0A1WCK4                             |
| 28   | 0.41 | 42.4        | 1259.6      | 1 | 130   | YSVGIVQDHNK                           | SVMP; <i>E. coloratus</i> ; ~E9JGA2                                 |
| 29   | 0.14 | 47.3        | 569.3       | 2 | 58    | HDDIFAYEK                             | LAAO; <i>G. halys</i> ; ~Q6STF1                                     |
|      |      |             | 567.3       | 2 | 53    | YPVKPSEEGK                            |                                                                     |
|      |      |             | 438.7       | 2 | 48    | STTDLPSR                              |                                                                     |
| 30   | 0.32 | 44.7        | 569.3       | 2 | 74    | HDDIFAYEK                             | LAAO; <i>Vipera ammodytes ammodytes</i> ; ~P0DI84                   |
|      |      |             | 630.8       | 2 | 46    | FWEDDGIHGGK                           |                                                                     |
|      |      |             | 438.7       | 2 | 44    | STTDLPSR                              |                                                                     |

Methionine oxidation is underlined.

**Table S2.** Assignment of the RP-HPLC fractions from Zhejiang *Azemiops feae* venom to protein families by MALDI-TOF-MS/MS and nESI-MS/MS of selected peptide ions from in-gel digested protein bands separated by SDS-PAGE. CNP: C-type natriuretic peptide; CRISP, cysteine-rich secretory protein; HA: Hyaluronidase; LAAO: L-amino acid oxidase; NGF: nerve growth factor; PLA<sub>2</sub>, phospholipase A<sub>2</sub>; SVMP: snake venom metalloproteinase; SVSP: snake venom serine proteinase; Unknown: unidentified components.

| Peak | %    | MW<br>(kDa) | Peptide Ion |   | Score | MS/MS-derived sequence  | Protein family/species/accession   |
|------|------|-------------|-------------|---|-------|-------------------------|------------------------------------|
|      |      |             | m/z         | z |       |                         |                                    |
| 1    | 0.22 | -           | 528.8       | 2 | 44    | TDQHYPAPK               | NGF; <i>Azemiops feae</i> ; B8QCH2 |
|      |      |             | 462.2       | 2 | 38    | TDQHYPAPKKAE            |                                    |
|      |      |             | 585.8       | 2 | 38    | NTDQHYPAPK              |                                    |
| 2    | 0.24 | -           | 657.7       | 3 | 54    | KTSRNTDQHYPAPKKAE       | NGF; <i>A. feae</i> ; B8QCH2       |
|      |      |             | 749.9       | 2 | 47    | NTDQHYPAPKKAE           |                                    |
|      |      |             | 505.6       | 3 | 47    | TSRNTDQHYPAPK           |                                    |
|      |      |             | 696.0       | 3 | 42    | KTSRNTDQHYPAPKKAED      |                                    |
|      |      |             | 585.8       | 2 | 42    | NTDQHYPAPK              |                                    |
|      |      |             | 692.8       | 2 | 42    | TDQHYPAPKKAE            |                                    |
|      |      |             | 707.3       | 2 | 40    | SRNTDQHYPAPK            |                                    |
|      |      |             | 821.9       | 2 | 40    | KTSRNTDQHYPAPK          |                                    |
|      |      |             | 615.0       | 3 | 39    | TSRNTDQHYPAPKKAE        |                                    |
|      |      |             | 528.8       | 2 | 38    | TDQHYPAPK               |                                    |
|      |      |             | 442.9       | 3 | 37    | RNTDQHYPAPK             |                                    |
| 3    | 1.81 | -           | 871.0       | 2 | 74    | AAATPQKLAKGRGAAATSA     | CNP; <i>A. feae</i> ; K4J3K2       |
|      |      |             | 1044.1      | 2 | 64    | SDSKAAATPQKLAKGRGAAATS  |                                    |
|      |      |             | 857.5       | 2 | 63    | PPHQGPRPPRPRPKP         |                                    |
|      |      |             | 608.8       | 2 | 61    | SDSKAAATPQKL            |                                    |
|      |      |             | 667.4       | 3 | 59    | SDSKAAATPQKLAKGRGAAAT   |                                    |
|      |      |             | 543.6       | 3 | 58    | SDSKAAATPQKLAKGR        |                                    |
|      |      |             | 633.7       | 3 | 57    | SDSKAAATPQKLAKGRGAAA    |                                    |
|      |      |             | 494.6       | 3 | 57    | AAATPQKLAKGRGAAA        |                                    |
|      |      |             | 586.3       | 3 | 54    | SDSKAAATPQKLAKGRGA      |                                    |
|      |      |             | 1079.6      | 2 | 54    | SDSKAAATPQKLAKGRGAAATSA |                                    |
|      |      |             | 644.3       | 2 | 54    | SDSKAAATPQKLA           |                                    |
|      |      |             | 809.0       | 2 | 53    | PHQGPRPPRPRPKP          |                                    |
|      |      |             | 371.6       | 3 | 51    | RLKGLAKKGAA             |                                    |

| Peak | %    | MW<br>(kDa) | Peptide Ion |   | Score | MS/MS-derived sequence  | Protein family/species/accession |
|------|------|-------------|-------------|---|-------|-------------------------|----------------------------------|
|      |      |             | m/z         | z |       |                         |                                  |
| 4    | 0.71 | -           | 375.6       | 3 | 50    | VPPKGESVGVR             | CNP; <i>A. feae</i> ; K4J3K2     |
|      |      |             | 627.8       | 2 | 50    | SLRPEAASGPAAAG          |                                  |
|      |      |             | 682.4       | 2 | 50    | KPPHQGPRPPRP            |                                  |
|      |      |             | 599.4       | 2 | 49    | PRPPRPRPKP              |                                  |
|      |      |             | 565.3       | 2 | 48    | DSKAAATPQKL             |                                  |
|      |      |             | 610.0       | 3 | 46    | SDSKAAATPQKLAKGRGAA     |                                  |
|      |      |             | 563.8       | 2 | 45    | SLRPEAASGPAA            |                                  |
|      |      |             | 529.3       | 2 | 45    | GRMVPPKGES              |                                  |
|      |      |             | 492.8       | 2 | 42    | SLRPEAASGP              |                                  |
|      |      |             | 528.3       | 2 | 41    | SLRPEAASGPA             |                                  |
|      |      |             | 380.7       | 2 | 41    | KPPHQGP                 |                                  |
|      |      |             | 575.8       | 2 | 39    | TDDTTALREE              |                                  |
|      |      |             | 557.3       | 3 | 38    | AATPQKLAKGRGAAATSA      |                                  |
|      |      |             | 367.6       | 3 | 37    | RPPRPRPKP               |                                  |
|      |      |             | 380.9       | 3 | 36    | ZGPRPPRPRP              |                                  |
|      |      |             | 458.8       | 2 | 36    | KPPHQGPR                |                                  |
|      |      |             | 921.5       | 2 | 35    | KPPHQGPRPPRPRPKP        |                                  |
|      |      |             | 556.6       | 3 | 35    | ZGPRPPRPRPKPSQS         |                                  |
|      |      |             | 455.9       | 3 | 34    | ZGPRPPRPRPKP            |                                  |
|      |      |             | 600.8       | 2 | 34    | DSKAAATPQKLA            |                                  |
|      |      |             | 760.4       | 2 | 34    | HQGPRPPRPRPKP           |                                  |
|      |      |             | 720.1       | 3 | 90    | SDSKAAATPQKLAKGRGAAATSA |                                  |
|      |      |             | 627.8       | 2 | 51    | SLRPEAASGPAAAG          |                                  |
|      |      |             | 682.4       | 2 | 49    | KPPHQGPRPPRP            |                                  |
|      |      |             | 771.4       | 1 | 48    | ZKPPGVY                 |                                  |
|      |      |             | 410.6       | 3 | 48    | AKGRGAAATSARL           |                                  |
|      |      |             | 515.8       | 2 | 48    | GRGAAATSARL             |                                  |
|      |      |             | 371.6       | 3 | 43    | RLKGLAKKGAA             |                                  |
|      |      |             | 422.7       | 2 | 41    | PHPHYPP                 |                                  |
|      |      |             | 563.8       | 2 | 38    | SLRPEAASGPAA            |                                  |
|      |      |             | 579.8       | 2 | 38    | KGRGAAATSARL            |                                  |
| 5    | 0.39 | -           | 380.7       | 2 | 37    | KPPHQGP                 | CNP; <i>A. feae</i> ; K4IT20     |
|      |      |             | 477.6       | 3 | 47    | RDLRTDGKQWR             |                                  |



| Peak | %     | MW<br>(kDa) | Peptide Ion |   | Score | MS/MS-derived sequence | Protein family/species/accession                 |
|------|-------|-------------|-------------|---|-------|------------------------|--------------------------------------------------|
|      |       |             | m/z         | z |       |                        |                                                  |
| 6    | 1.49  | -           | 410.6       | 3 | 43    | AKGRGAAATSARL          | CNP; <i>A. feae</i> ; K4IT20                     |
|      |       |             | 424.6       | 3 | 39    | MVPPKGESVGVR           |                                                  |
|      |       |             | 459.6       | 3 | 39    | AKGRGAAATSARLM         |                                                  |
|      |       |             | 637.8       | 2 | 36    | DLRTDGKQWR             |                                                  |
|      |       |             | 459.6       | 3 | 35    | AKGRGAAATSARLM         |                                                  |
| 7    | 0.59  | -           | 482.7       | 2 | 33    | GAAATSARLM             | CNP; <i>A. feae</i> ; K4IT20                     |
|      |       |             | 509.3       | 2 | 32    | KPPGVYYPP              |                                                  |
|      |       |             | 425.6       | 3 | 32    | DLRTDGKQWR             |                                                  |
| 8    | 3.66  | -           | 460.7       | 2 | 26    | KPGVYYPP               | CNP; <i>A. feae</i> ; K4IT20                     |
|      |       |             | 600.8       | 2 | 46    | SGPAAAGVGDGWR          |                                                  |
|      |       |             | 491.9       | 3 | 42    | LAKGRGAAATSARLM        |                                                  |
|      |       |             | 557.3       | 2 | 42    | GPAAAGVGDGWR           |                                                  |
|      |       |             | 509.3       | 2 | 39    | KPPGVYYPP              |                                                  |
| 9    | 2.33  | -           | 440.2       | 3 | 48    | AIVCGGDNPCKK           | PLA <sub>2</sub> ; <i>A. feae</i> ; A0A0D3N8V5   |
| 10   | 0.89  | 3.8         | 403.7       | 2 | 18    | AAAICFR                | PLA <sub>2</sub> ; <i>A. feae</i> ; A0A0D3N8V5   |
| 11   | 35.00 | 5.0         | 403.7       | 2 | 29    | AAAICFR                | PLA <sub>2</sub> ; <i>A. feae</i> ; A7X4P4       |
|      |       |             | 440.2       | 2 | 21    | AVCECDK                |                                                  |
|      |       |             | 552.2       | 2 | 30    | RQPMDATDR              |                                                  |
| 12   | 0.23  | 28.2        | 500.3       | 2 | 42    | IACAPQDVK              | SVMP; <i>Crotalus adamanteus</i> ; ~A0A1W7RB89   |
|      |       |             | 564.3       | 2 | 54    | KIACAPQDVK             |                                                  |
|      |       |             | 376.2       | 3 | 31    | KIACAPQDVK             |                                                  |
|      |       |             | 494.7       | 2 | 46    | TDSYPYSR               |                                                  |
| 13   | 0.10  | -           | 494.7       | 2 | 46    | TDSYPYSR               | PLA <sub>2</sub> ; <i>A. feae</i> ; A0A0D3N9P6   |
| 14   | 1.70  | 14.3        | 403.7       | 2 | 53    | AAAICFR                | PLA <sub>2</sub> ; <i>A. feae</i> ; A7X4P4       |
|      |       |             | 340.5       | 3 | 42    | TLHYIYGR               |                                                  |
|      |       |             | 510.8       | 2 | 35    | TLHYIYGR               |                                                  |
| 15   | 0.53  | 12.7        | 403.7       | 2 | 35    | AAAICFR                | PLA <sub>2</sub> ; <i>A. feae</i> ; A7X4P4       |
|      |       |             | 436.7       | 2 | 30    | NNVIVCR                |                                                  |
|      |       |             | 552.2       | 2 | 22    | RQPMDATDR              |                                                  |
|      |       |             | 544.3       | 2 | 26    | RQPMDATDR              |                                                  |
|      |       |             | 1111.6      | 1 | 25    | NPNPVPTGCR             |                                                  |
|      | 0.69  | 16.2        | 1293.7      | 1 | 77    | IDTACVCVISR            | NGF; <i>Protobothrops flavoviridis</i> ; ~B1Q3K2 |
|      |       |             | 1809.9      | 1 | 74    | HWNSYCTTTHTFVR         |                                                  |
|      |       |             | 340.5       | 3 | 42    | TLHYIYGR               |                                                  |
|      |       |             | 340.5       | 3 | 42    | TLHYIYGR               |                                                  |
|      | 0.58  | 14.4        | 340.5       | 3 | 42    | TLHYIYGR               | PLA <sub>2</sub> ; <i>A. feae</i> ; A7X4P4       |
|      |       |             | 340.5       | 3 | 42    | TLHYIYGR               |                                                  |

| Peak | %    | MW<br>(kDa) | Peptide Ion |   | Score | MS/MS-derived sequence       | Protein family/species/accession                                                                                                                                 |
|------|------|-------------|-------------|---|-------|------------------------------|------------------------------------------------------------------------------------------------------------------------------------------------------------------|
|      |      |             | m/z         | z |       |                              |                                                                                                                                                                  |
|      | 0.19 | 12.6        | 510.8       | 2 | 39    | TLHYIYGR                     | PLA <sub>2</sub> ; <i>A. feae</i> ; A7X4P4                                                                                                                       |
|      |      |             | 511.8       | 2 | 59    | TLHYIYGR                     |                                                                                                                                                                  |
|      |      |             | 511.9       | 3 | 58    | CCFVHDCCYGR                  |                                                                                                                                                                  |
|      |      |             | 437.7       | 2 | 49    | NNVIVCR                      |                                                                                                                                                                  |
| 16   | 0.07 | 14.9        | 549.3       | 2 | 75    | NPNPVPSGCR                   | NGF; <i>A. feae</i> ; Q2XXL6                                                                                                                                     |
|      |      |             | 707.3       | 2 | 41    | CRNPNPVPSGCR                 |                                                                                                                                                                  |
| 17   | 0.27 | 14.7        | 1096.5      | 1 | 38    | DNLDITYSLR                   | PLA <sub>2</sub> ; <i>A. feae</i> ; A0A0D3N9S4                                                                                                                   |
|      |      |             | 1475.6      | 1 | 20    | CCFVHNCCYR                   |                                                                                                                                                                  |
| 18   | 0.21 | 15.3        | 1096.6      | 1 | 59    | DNLDITYSLR                   | PLA <sub>2</sub> ; <i>A. feae</i> ; A0A0D3N9S4                                                                                                                   |
|      |      |             | 1475.6      | 1 | 35    | CCFVHNCCYR                   |                                                                                                                                                                  |
| 19   | 5.89 | 28.2        | 1489.6      | 1 | 10    | CCFVHNCCYRK                  | CRISP; <i>Crotalus horridus</i> ; ~F2Q6E5                                                                                                                        |
|      |      |             | 1138.5      | 1 | 55    | SVDFDSESPR                   |                                                                                                                                                                  |
|      |      |             | 1537.7      | 1 | 15    | MEWYPEAAANAER                |                                                                                                                                                                  |
|      |      |             | 1553.7      | 1 | 19    | MEWYPEAAANAER                |                                                                                                                                                                  |
|      |      |             | 1905.1      | 1 | 121   | KPEIQNEIVDLHNSLR             |                                                                                                                                                                  |
|      |      |             | 2061.2      | 1 | 4     | KPEIQNEIVDLHNSLR             |                                                                                                                                                                  |
|      |      |             | 1138.5      | 1 | 21    | SVDFDSESPR                   |                                                                                                                                                                  |
|      |      |             | 1905.0      | 1 | 25    | KPEIQNEIVDLHNSLR             |                                                                                                                                                                  |
| 20   | 0.22 | 14.4        | 403.7       | 2 | 35    | AAAICFR                      | CRISP; <i>C. horridus</i> ; ~F2Q6E7<br>PLA <sub>2</sub> ; <i>A. feae</i> ; A0A0D3N8V5<br>SVSP; <i>A. feae</i> ; A0A1Y0DIB6                                       |
|      |      |             | 1304.6      | 1 | 15    | NFQMQLGVHSK                  |                                                                                                                                                                  |
|      |      |             | 2599.2      | 1 | 11    | ETYPDVPNCANINILDHAVCQR       |                                                                                                                                                                  |
|      |      |             | 1535.5      | 1 | 30    | CCFEHDCCYGK                  |                                                                                                                                                                  |
| 21   | 2.82 | 32.2        | 1304.6      | 1 | 22    | NFQMQLGVHSK                  | PLA <sub>2</sub> ; <i>Bothriechis nigroviridis</i> ; ~C0HJL8<br>SVSP; <i>A. feae</i> ; A0A1Y0DIB6                                                                |
|      |      |             | 2599.2      | 1 | 63    | ETYPDVPNCANINILDHAVCQR       |                                                                                                                                                                  |
|      |      |             | 2915.5      | 1 | 54    | LNSPVHESTHIAPVSLPSSSPTVGSVCR |                                                                                                                                                                  |
|      |      |             | 2599.3      | 1 | 50    | ETYPDVPNCANINILDHAVCQR       |                                                                                                                                                                  |
|      |      |             | 2915.6      | 1 | 62    | LNSPVHESTHIAPVSLPSSSPTVGSVCR |                                                                                                                                                                  |
| 22   | 0.07 | 18.7        | 403.7       | 2 | 53    | AAAICFR                      | PLA <sub>2</sub> ; <i>A. feae</i> ; A7X4P4<br>SVSP; <i>Bothrops jararaca</i> ; ~O13069<br>SVSP; <i>A. feae</i> ; A0A1Y0DIB6<br>SVSP; <i>A. feae</i> ; A0A1Y0DIB6 |
|      |      |             | 558.3       | 2 | 67    | TLCAGILQGGK                  |                                                                                                                                                                  |
|      |      |             | 2599.2      | 1 | 31    | ETYPDVPNCANINILDHAVCQR       |                                                                                                                                                                  |
|      |      |             | 1288.6      | 1 | 69    | NFQMQLGVHSK                  |                                                                                                                                                                  |
|      |      |             | 1304.6      | 1 | 34    | NFQMQLGVHSK                  |                                                                                                                                                                  |
|      |      |             | 2599.2      | 1 | 130   | ETYPDVPNCANINILDHAVCQR       |                                                                                                                                                                  |

| Peak | %     | MW<br>(kDa) | Peptide Ion |   | Score | MS/MS-derived sequence       | Protein family/species/accession               |
|------|-------|-------------|-------------|---|-------|------------------------------|------------------------------------------------|
|      |       |             | m/z         | z |       |                              |                                                |
| 23   | 0.05  | 18.4        | 2915.5      | 1 | 159   | LNSPVHESTHIAPVSLPSSSPTVGSVCR | PLA <sub>2</sub> ; <i>A. feae</i> ; A0A0D3N8V5 |
|      |       |             | 753.3       | 2 | 75    | CCFVHDCCYGK                  |                                                |
|      |       |             | 659.8       | 2 | 69    | AIVCGGDNPCCK                 |                                                |
|      |       |             | 576.9       | 2 | 69    | EVCECDKAAAICFR               |                                                |
|      |       |             | 595.8       | 2 | 66    | AIVCGGDNPCCK                 |                                                |
|      |       |             | 683.8       | 2 | 58    | MDSYTYSEENK                  |                                                |
|      | 0.38  | 15.0        | 404.7       | 2 | 57    | AAAICFR                      | PLA <sub>2</sub> ; <i>A. feae</i> ; A0A0D3N8V5 |
|      |       |             | 690.8       | 2 | 64    | MDSYTYSEENK                  |                                                |
|      |       |             | 682.8       | 2 | 56    | MDSYTYSEENK                  |                                                |
|      |       |             | 1069.4      | 2 | 37    | VTGCDPKMDSYTYSEENK           |                                                |
|      |       |             | 752.3       | 2 | 48    | CCFVHDCCYGK                  |                                                |
|      | 0.36  | 56.0        | 501.5       | 3 | 30    | CCFVHDCCYGK                  | SVSP; <i>A. feae</i> ; A0A1Y0DIB5              |
|      |       |             | 1513.7      | 1 | 200   | IIGGDECDINDHR                |                                                |
|      |       |             | 1117.7      | 1 | 31    | TLCAGILKGGK                  |                                                |
|      | 0.19  | 48.6        | 572.3       | 2 | 56    | EKFFCLSSK                    | SVSP; <i>A. feae</i> ; A0A1Y0DIB4              |
|      |       |             | 443.7       | 2 | 31    | FFCLSSK                      |                                                |
|      | 0.05  | 32.7        | 1116.1      | 2 | 17    | NSAHIAPLSLPSSPPSVGSVCR       | SVSP; <i>A. feae</i> ; A0A1Y0DIB4              |
|      |       |             | 1095.7      | 1 | 14    | FLVALYTLR                    |                                                |
|      |       |             | 1003.6      | 1 | 20    | ALYPGLLEK                    |                                                |
|      |       |             | 1095.7      | 1 | 38    | FLVALYTLR                    |                                                |
|      |       |             | 2233.2      | 1 | 8     | NSAHIAPLSLPSSPPSVGSVCR       |                                                |
|      | 0.06  | 28.2        | 2480.2      | 1 | 9     | ETYPDVPHCANINIVDHAVCR        | SVSP; <i>A. feae</i> ; A0A1Y0DIB4              |
|      |       |             | 1003.6      | 1 | 15    | ALYPGLLEK                    |                                                |
|      |       |             | 1003.6      | 1 | 12    | ALYPGLLEK                    |                                                |
|      | 0.28  | 15.9        | 2233.3      | 1 | 30    | NSAHIAPLSLPSSPPSVGSVCR       | SVSP; <i>A. feae</i> ; A0A1Y0DIB4              |
|      |       |             | 2233.3      | 1 | 30    | NSAHIAPLSLPSSPPSVGSVCR       |                                                |
| 24   | 12.00 | 15.6        | 1505.5      | 1 | 10    | CCFVHDCCYGK                  | PLA <sub>2</sub> ; <i>A. feae</i> ; A0A0D3N8V5 |
| 25   | 5.56  | 19.7        | 998.5       | 1 | 29    | TDPPYPYSR                    | PLA <sub>2</sub> ; <i>A. feae</i> ; A0A0D3N944 |
| 26   | 0.07  | 42.3        | 1534.6      | 1 | 3     | CCFEHNCCYGK                  | SVSP; <i>A. feae</i> ; A0A1Y0DIC1              |
|      |       |             | 414.2       | 2 | 17    | KVPNEDK                      |                                                |
|      |       |             | 2929.5      | 1 | 99    | LNSPVHESTHIAPLSLPSSSPTVGSVCR |                                                |
|      |       |             | 918.5       | 1 | 45    | VYPGLLEK                     |                                                |
|      |       |             | 2537.3      | 1 | 64    | VTHPDVPHCANINILNHAVCQK       |                                                |
|      | 0.14  | 28.9        | 2929.5      | 1 | 119   | LNSPVHESTHIAPLSLPSSSPTVGSVCR | SVSP; <i>A. feae</i> ; A0A1Y0DIC1              |
|      |       |             | 2929.5      | 1 | 119   | LNSPVHESTHIAPLSLPSSSPTVGSVCR |                                                |

| Peak | %    | MW<br>(kDa) | Peptide Ion |   | Score | MS/MS-derived sequence             | Protein family/species/accession                  |
|------|------|-------------|-------------|---|-------|------------------------------------|---------------------------------------------------|
|      |      |             | m/z         | z |       |                                    |                                                   |
| 27   | 0.52 | 16.9        | 1022.5      | 1 | 36    | TLHYIYGR                           | PLA <sub>2</sub> ; <i>A. feae</i> ; A7X4P4        |
|      |      |             | 1488.7      | 1 | 29    | IGLQFYVDAFCR                       |                                                   |
|      |      |             | 1533.6      | 1 | 36    | CCFVHDCCYGR                        |                                                   |
|      |      |             | 1967.8      | 1 | 25    | NPVTSYSAYGCYCGVGGR                 |                                                   |
|      | 0.63 | 15.6        | 1022.6      | 1 | 46    | TLHYIYGR                           | PLA <sub>2</sub> ; <i>A. feae</i> ; A7X4P4        |
|      |      |             | 1488.8      | 1 | 18    | IGLQFYVDAFCR                       |                                                   |
|      |      |             | 1533.7      | 1 | 12    | CCFVHDCCYGR                        |                                                   |
|      | 0.43 | 16.9        | 1022.5      | 1 | 45    | TLHYIYGR                           | PLA <sub>2</sub> ; <i>A. feae</i> ; A7X4P4        |
|      |      |             | 1488.8      | 1 | 50    | IGLQFYVDAFCR                       |                                                   |
|      |      |             | 1533.6      | 1 | 42    | CCFVHDCCYGR                        |                                                   |
|      | 0.68 | 15.6        | 1022.6      | 1 | 7     | TLHYIYGR                           | PLA <sub>2</sub> ; <i>A. feae</i> ; A7X4P4        |
|      |      |             | 1488.8      | 1 | 3     | IGLQFYVDAFCR                       |                                                   |
| 28   | 3.64 | 67.9        | 439.2       | 2 | 48    | YDTYSTK                            | LAAO; <i>Ovophis okinavensis</i> ; ~T2HQ57        |
|      |      |             | 554.3       | 2 | 46    | VTVTYQTPAK                         |                                                   |
|      |      |             | 567.3       | 2 | 35    | YPVKPSEEGK                         |                                                   |
| 29   | 0.09 | 156.0       | -           | - | -     | -                                  | Unknown                                           |
|      | 1.69 | 86.0        | 1059.4      | 1 | 53    | GQDNFYCR                           | SVMP; <i>Sistrurus tergeminus</i> ; ~A0A194ARR8   |
|      | 0.46 | 55.9        | 1388.6      | 2 | 1     | YSDDYSDDVLDDGMVDHG <b>TK</b> CAVGK | SVMP; <i>Agkistrodon piscivorus</i> ; ~A0A194ARK7 |
|      | 0.17 | 65.9        | 1852.0      | 1 | 29    | DSTALFPNIYLETVLR                   | HA; <i>A. piscivorus</i> ; ~A0A194ART0            |
|      |      |             | 1889.9      | 1 | 6     | HSDSNAFLHLFPDSFR                   |                                                   |
| 30   | 0.15 | 97.3        | 2018.0      | 1 | 15    | KHSDSNAFLHLFPDSFR                  | SVMP; <i>C. horridus</i> ; ~A0A0K8RYQ3            |
|      |      |             | 836.8       | 2 | 46    | GSQCADGVCCDQCR                     |                                                   |
|      |      |             | 449.2       | 2 | 40    | TL <b>SH</b> QPSK                  |                                                   |
|      | 0.35 | 60.0        | 656.3       | 2 | 49    | SADCPTDDFQR                        | SVMP; <i>S. tergeminus</i> ; ~A0A194ARL0          |
|      |      |             | 425.2       | 2 | 37    | RAGTEC                             |                                                   |
| 31   | 2.31 | -           | 1458.1      | 2 | 1     | MARGDNMHDYCN <b>G</b> KTCDCPXNPYK  | SVMP; <i>Echis ocellatus</i> ; ~E9KJX0            |
| 32   | 1.00 | 54.7        | 376.9       | 3 | 2     | VHQM <b>V</b> NIM <b>K</b>         | SVMP; <i>Crotalus atrox</i> ; ~P34182             |

Methionine oxidation is underlined.
